# Supplementary material for: Heteroepitaxial growth of MFI zeolite over titanosilicate molecular sieves
Source: Royal Society of Chemistry journal article supplement (doi:10.1039/b905712a), 2009-01-01
Supplement: b905712a.pdf [file b905712a.pdf]

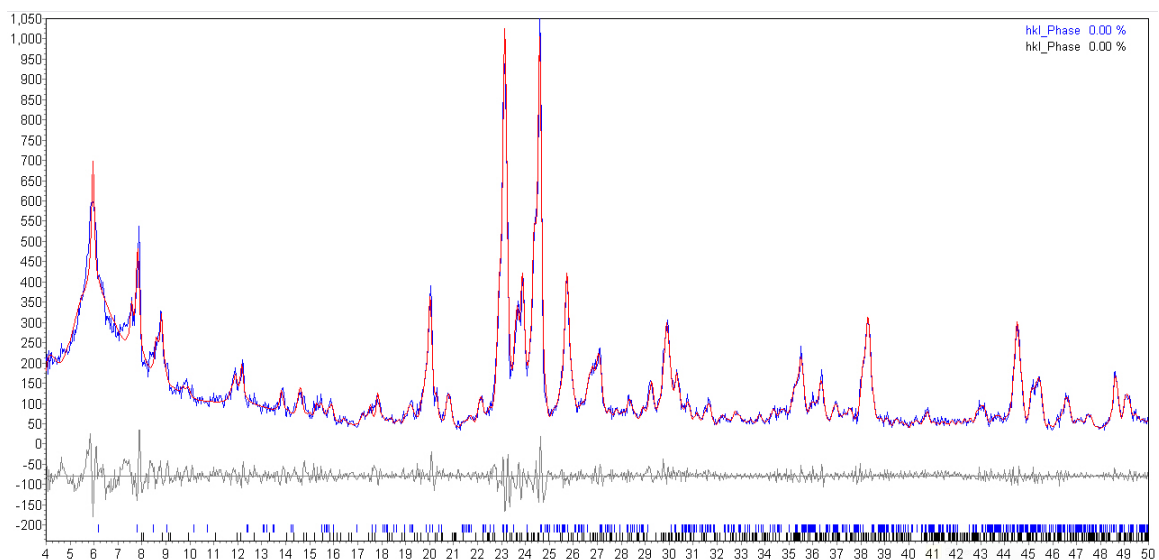

Fig. S1. LeBail fit of heteroepitaxially grown MFI (Bragg reflections are the black bars - down) on ETS-10 (Bragg reflections are the blue bars - up). The starting unit cell parameters and space group were taken from ref. [18] and [19].

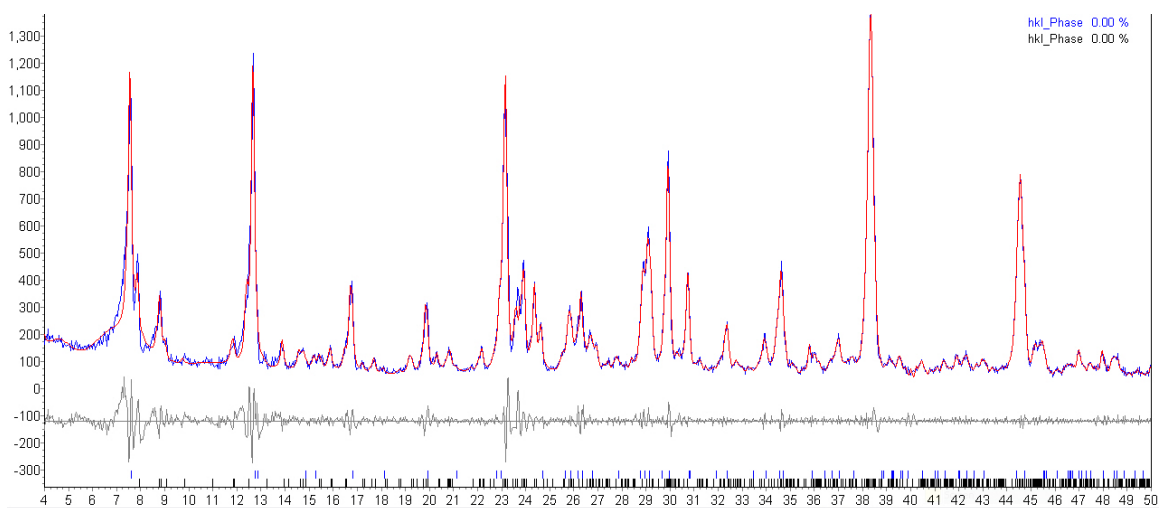

Fig. S2. LeBail fit of heteroepitaxially grown MFI (Bragg reflections are the black bars - down) on ETS-4 (Bragg reflections are the blue bars - up). The starting unit cell parameters and space group were taken from ref. [19] and [20].
